# Supplementary material
Source: publisher figshare collection journal article supplement (https://tandf.figshare.com/articles/dataset/_/5948215)
Supplement: Supplementary file 1 [file 2 › supplementary_1.txt]

nstates cont;
xread
'Olroyd et al. 2017 Dicynodont Matrix'
194 102
&[continuous]
Biarmosuchus_tener	0.693 ? 0.261 ? 0.148 0.029 ? ? 5.8 ? ? ? 1.06 ? 0.502 1.87 ? 0.446 ? 0.553 0.426 0.0 ?
Hipposaurus_boonstrai	0.606 ? 0.263 0.842 0.19 0.046 ? ? 3.5 ? ? ? 1.07 ? 0.539 2.63 0.667 0.367 0.125 ? ? 0.0 0.222
Archaeosyodon_praeventor	? ? ? ? ? 0.104 ? ? 5.6 ? ? ? ? ? 0.92 ? ? ? ? ? ? ? ?
Titanophoneus_potens	0.758 ? 0.244 0.7 0.227 0.051 ? ? 6.2 ? ? ? 1.16 ? 0.855 1.62 0.5 0.292 0.274 0.5 ? 0.0 0.343
Gorgonops_torvus	0.504 ? 0.29 1.15 0.305 0.072 ? ? 8.5 ? ? ? 0.977 ? ? ? ? 0.329 ? ? ? ? ?
Lycosuchus_vanderrieti	0.509 ? 0.261 0.333 0.352 0.303 ? ? 7.7 0.094 ? ? 1.06 ? 0.595 1.71 0.5 0.333 0.294 ? ? 0.0 0.4
Glanosuchus_macrops	0.547 ? 0.145 0.25 0.367 0.218 ? ? 5.3 0.05 ? ? 1.02 ? 0.718 2.12 0.545 0.309 0.2 0.833 ? 0.0 0.342
Biseridens_qilianicus	? ? ? 1.032 ? 0.094 ? ? ? ? ? 11.0 ? ? 0.956 ? ? ? ? ? ? ? ?
Anomocephalus_africanus	? ? ? ? ? ? ? ? ? ? ? ? ? ? ? ? ? ? ? ? ? ? ?
Tiarajudens_eccentricus	? ? ? ? ? ? ? ? ? ? ? ? ? ? ? ? ? 0.396 0.164 ? ? ? ?
Otsheria_netzvetajevi	0.381 5.425 0.231 ? 0.512 0.108 ? 0.181 5.3 0.108 10.95 15.5 0.86 ? ? ? ? ? ? ? ? ? ?
Ulemica	0.47 5.364 0.125 1.06 0.407 0.102 ? 0.216 4.9 ? 10.905 15.4 1.098 0.294 0.964 1.135 ? ? ? ? ? ? ?
Suminia_getmanovi	0.336 4.879 0.205 ? 0.23 0.105 ? 0.198 5.0 0.09 10.455 11.6 0.902 0.395 0.899 1.136 0.558 0.299 0.133 0.709 0.966 0.0 0.186
Patranomodon_nyaphulii	0.29 ? 0.228 0.914 0.272 0.076 ? 0.202 6.0 0.043 11.029 13.7 0.744 0.476 1.25 1.059 ? ? ? ? ? 0.0 ?
Galeops_whaitsi	0.339 5.325 0.18 ? 0.327 ? ? 0.136 4.1 ? 10.385 ? ? 0.489 0.831 0.968 0.646 0.356 0.181 ? ? ? 0.257
Galepus_jouberti	? ? ? 0.855 ? ? ? ? ? ? ? ? ? ? ? ? ? 0.351 0.149 ? ? 0.0 ?
Galechirus_scholtzi	? ? ? ? ? ? ? ? ? ? ? ? ? 0.355 0.865 0.7 ? 0.401 0.206 ? ? 0.0 ?
Eodicynodon_oelofseni	0.351 ? ? 0.968 0.435 ? 2.47 ? ? ? ? 12.0 ? 0.259 0.708 ? ? ? ? ? ? ? ?
Eodicynodon_oosthuizeni	0.322 5.555 0.234 0.908 0.518 0.111 2.501 0.14 8.2 0.182 10.457 9.0 0.847 0.253 0.698 1.061 0.446 0.509 0.244 0.3 0.5 0.0 0.475
Colobodectes_cluveri	0.203 5.714 0.195 ? 0.52 0.269 2.07 0.144 6.6 0.206 10.177 ? 0.948 ? ? ? ? ? ? ? ? ? ?
Lanthanostegus_mohoii	? ? ? 0.661 ? ? 2.434 ? ? ? ? ? ? ? ? ? ? ? ? ? ? ? ?
Eosimops_newtoni	0.186 5.89 0.243 0.795 0.541 0.257 2.014 0.126 8.1 0.172 9.402 11.3 0.831 0.402 0.803 0.904 0.633 0.466 0.26 ? ? 0.0 0.444
Diictodon_feliceps	0.247 5.925 0.223 0.64 0.534 0.273 1.702 0.135 8.0 0.214 9.418 11.9 0.881 0.257 0.742 0.901 0.453 0.483 0.287 0.67 1.388 0.0 0.366
Robertia_broomiana	0.237 5.863 0.197 0.721 0.555 0.259 1.681 0.108 8.6 0.199 9.417 9.8 0.85 0.132 0.711 0.868 0.487 0.502 0.227 ? ? 0.0 0.309
Prosictodon_dubei	0.238 5.807 0.171 0.864 0.548 0.228 2.469 0.098 8.1 0.131 9.78 9.3 0.881 ? 0.834 0.637 ? ? ? ? ? ? ?
Endothiodon_bathystoma	0.335 5.396 0.378 0.268 0.599 0.4 1.457 0.111 8.1 0.147 9.694 7.1 0.988 0.373 0.798 0.73 0.554 0.491 0.406 0.301 0.964 0.0 0.414
Endothiodon_tolani	0.328 ? ? 0.396 ? 0.025 1.505 0.109 10.6 ? ? ? 0.902 0.319 0.723 0.825 ? ? ? ? ? ? ?
Niassodon_mfumukasi	? ? ? 0.867 ? ? 1.548 ? 8.4 ? ? 9.5 0.697 0.29 0.859 0.938 ? ? ? 0.214 1.145 ? ?
Brachyprosopus_broomi	0.231 5.81 0.19 0.998 0.515 0.338 1.847 0.129 6.8 0.15 9.687 10.6 0.898 0.132 0.715 0.824 0.612 0.437 ? ? ? 0.0 0.315
Pristerodon_mackayi	0.225 5.874 0.184 1.021 0.582 0.218 1.751 0.123 10.0 0.206 9.578 11.2 0.813 0.208 0.723 0.928 0.561 0.433 ? 0.275 0.5 0.0 0.277
Emydops	0.22 5.872 0.204 0.906 0.537 0.166 1.646 0.118 9.8 0.176 9.667 9.3 0.84 0.398 0.692 0.955 0.668 0.428 0.23 0.454 1.283 0.0 0.353
Compsodon_helmoedi	0.196 5.874 0.207 1.066 0.431 0.188 1.71 0.082 10.3 0.022 9.858 11.0 0.817 ? ? ? ? ? ? ? ? ? ?
Digalodon_rubidgei	0.354 6.155 0.294 0.899 0.473 0.139 1.565 0.134 ? 0.173 ? ? 0.871 0.293 ? ? ? ? ? ? ? ? ?
Dicynodontoides	0.271 5.95 0.24 0.751 0.543 0.21 1.492 0.084 8.8 0.181 9.814 11.9 0.885 ? 0.722 0.924 0.304 0.497 ? 0.167 2.5 0.406 0.359
Kombuisia_frerensis	0.193 5.976 0.202 0.4 0.555 ? 1.589 0.195 ? ? 9.645 ? 0.746 ? 0.684 ? ? ? ? ? ? ? ?
Myosaurus_gracilis	0.26 5.902 0.275 1.032 0.483 0.108 1.59 0.085 9.6 0.208 9.775 9.6 0.853 0.348 0.958 0.942 0.586 ? ? ? ? ? 0.208
Cistecephalus_microrhinus	0.265 6.056 0.279 1.155 0.52 0.093 1.75 0.117 9.5 ? 9.965 8.7 0.867 0.361 0.687 0.789 0.485 0.403 0.317 0.754 1.857 0.0 0.324
Cistecephaloides_boonstrai	0.311 6.047 0.425 1.319 0.372 0.04 ? 0.194 ? ? 10.305 12.5 0.632 0.346 0.796 0.914 ? ? ? ? ? ? ?
Kawingasaurus_fossilis	0.308 5.933 0.33 1.404 0.34 ? 1.5 0.135 10.7 ? 10.119 10.0 0.836 0.286 ? 0.964 0.298 0.419 ? ? ? ? 0.446
Daqingshanodon_limbus	0.282 6.112 0.26 0.619 0.442 0.18 1.528 0.08 ? 0.189 9.34 10.3 0.808 0.212 0.677 0.819 ? ? ? ? ? ? ?
Keyseria_benjamini	0.244 6.155 0.159 1.034 0.605 0.203 1.6 0.083 6.3 ? ? 9.0 0.831 ? ? ? ? ? ? ? ? ? ?
Rhachiocephalus_magnus	0.329 6.094 0.271 0.738 0.598 0.606 1.48 0.094 8.8 0.143 9.17 12.8 1.011 0.155 0.816 0.777 0.501 0.506 ? ? ? ? 0.372
Kitchinganomodon_crassus	0.32 6.137 0.318 0.708 0.566 0.752 1.556 0.108 7.4 0.07 9.747 11.1 0.936 0.165 0.843 0.752 ? 0.466 ? ? ? ? ?
Oudenodon_bainii	0.28 6.054 0.173 0.844 0.609 0.271 1.458 0.092 8.1 0.141 9.219 11.3 0.864 0.264 0.799 0.751 0.57 0.494 0.366 0.514 0.765 0.353 0.411
Tropidostoma_dubium	0.287 5.989 0.197 0.886 0.576 0.275 1.436 0.098 8.8 0.14 9.106 12.4 0.871 0.234 0.759 0.766 0.552 0.503 ? 0.474 1.368 0.329 0.349
Australobarbarus	0.333 6.058 0.183 0.697 0.561 0.298 1.324 0.101 6.1 0.16 9.822 13.35 0.882 0.193 0.624 0.694 0.466 0.485 ? 0.848 1.033 0.333 0.391
Syops_vanhoepeni	? ? ? 0.484 ? 0.343 ? ? ? ? ? ? ? ? ? ? ? ? ? ? ? ? ?
Odontocyclops_whaitsi	0.376 6.066 0.232 0.988 0.551 0.232 1.448 0.092 10.1 0.131 9.74 12.3 0.929 0.221 0.784 0.752 0.609 0.518 0.386 0.435 1.13 0.469 0.459
Idelesaurus_tataricus	0.367 5.967 0.175 1.022 0.5 0.174 1.497 0.107 8.25 0.173 10.118 13.5 0.969 0.204 0.693 0.764 ? ? ? ? ? ? ?
Aulacephalodon_bainii	0.3 6.089 0.323 0.892 0.583 0.204 1.425 0.117 6.8 0.122 9.48 13.5 0.822 0.172 0.76 0.785 0.55 0.532 0.348 0.714 1.067 0.395 0.491
Pelanomodon_moschops	0.289 6.093 0.305 0.912 0.584 0.213 1.468 0.104 9.4 0.155 9.414 12.3 0.801 ? 0.856 0.742 ? ? ? ? ? ? ?
Geikia_locusticeps	0.289 6.093 0.305 0.912 0.584 0.213 1.468 0.104 9.4 0.155 9.414 12.3 0.801 ? 0.856 0.742 ? ? ? ? ? ? ?
Geikia_elginensis	0.366 ? 0.521 0.846 0.529 ? 1.429 ? ? ? ? 13.1 0.829 0.212 0.9 0.987 ? ? ? ? ? ? ?
Elph_borealis	0.279 5.927 0.186 0.64 0.544 0.29 1.515 0.157 8.9 ? ? 13.0 0.914 ? 0.781 ? ? ? ? ? ? ? ?
Interpresosaurus_blomi	? ? ? ? ? ? ? ? ? ? ? ? ? ? ? ? ? ? ? ? ? ? ?
Katumbia_parringtoni	0.196 5.868 0.22 0.527 0.541 0.347 1.489 0.112 9.3 0.132 9.928 14.4 ? ? 0.833 0.822 ? ? ? ? ? ? ?
Delectosaurus_arefjevi	0.369 5.861 0.258 0.702 0.546 0.334 1.618 0.119 7.8 0.13 9.798 14.7 0.985 ? ? ? ? ? ? ? ? ? ?
Dicynodon_lacerticeps	0.324 5.982 0.253 0.607 0.546 0.359 1.485 0.117 7.7 0.121 9.869 11.9 0.926 0.241 0.749 0.766 ? ? ? ? ? ? ?
Dicynodon_huenei	0.317 5.952 0.243 0.526 0.566 0.353 1.317 0.109 8.2 0.115 9.889 11.8 0.961 0.206 0.756 0.818 0.538 0.554 0.317 0.625 1.313 0.374 0.522
Daptocephalus_leoniceps	0.268 6.091 0.237 0.539 0.567 0.437 1.5 0.118 6.4 0.111 9.378 ? 0.8584 0.238 0.763 0.75 ? 0.545 ? ? 1.667 ? ?
Dinanomodon_gilli	0.337 6.17 0.205 0.48 0.577 0.522 1.347 0.116 7.8 0.107 9.751 9.9 1.047 0.186 ? 0.724 ? ? ? ? ? ? ?
Peramodon_amalitzkii	0.272 ? 0.224 0.563 0.553 0.369 ? ? ? ? ? 9.5 0.839 0.167 0.676 0.68 0.463 ? ? ? ? ? 0.494
Vivaxosaurus_trautscholdi	0.38 6.019 0.23 0.685 0.481 0.285 1.824 0.116 7.9 0.121 10.203 13.9 1.041 0.203 0.702 0.731 0.317 0.544 ? ? ? ? 0.641
Jimusaria_sinkiangensis	0.307 ? 0.278 0.672 0.767 0.464 1.443 0.089 7.2 0.098 ? 8.9 0.992 0.251 0.822 0.699 ? ? ? ? ? ? ?
Sintocephalus_alticeps	0.354 5.969 0.244 0.516 0.522 0.294 1.338 0.124 6.5 0.132 9.399 9.6 1.022 ? ? ? ? ? ? ? ? ? ?
Basilodon_woodwardi	0.315 5.994 0.212 0.722 0.497 0.225 1.305 0.128 5.7 0.139 9.599 12.6 0.814 ? ? ? ? ? ? ? ? ? ?
Turfanodon_bogdaensis	? ? ? 0.588 ? 0.405 1.327 ? ? ? ? 10.3 0.895 ? ? ? ? ? ? ? ? ? ?
Gordonia_traquairi	0.252 ? 0.139 0.65 0.604 0.309 ? ? ? ? ? ? 0.924 0.188 ? 0.773 0.543 0.49 0.144 ? ? ? 0.476
Euptychognathus_bathyrhynchus	0.336 6.028 0.13 0.562 0.56 0.238 1.559 0.091 6.5 0.084 9.663 10.25 0.792 ? 0.79 0.815 ? ? ? ? ? ? ?
Lystrosaurus_hedini	0.32 6.111 0.414 0.705 0.413 0.146 1.471 0.174 9.2 0.079 10.203 11.4 0.673 0.294 0.691 0.781 ? ? ? ? ? ? ?
Lystrosaurus_maccaigi	0.274 6.072 0.347 0.656 0.325 0.108 1.764 0.165 8.4 0.123 10.022 10.9 0.805 0.354 0.711 0.706 ? 0.526 0.54 ? ? 0.389 ?
Lystrosaurus_curvatus	0.311 6.005 0.39 0.679 0.444 0.132 1.664 0.162 7.4 0.086 10.145 8.6 0.893 ? 0.767 0.643 0.466 0.485 0.516 0.949 1.587 0.322 0.509
Lystrosaurus_declivis	0.347 5.954 0.424 0.705 0.415 0.112 2.141 0.157 8.8 0.097 10.309 9.7 0.874 0.315 0.757 0.711 0.418 0.458 0.478 0.75 1.3 0.347 0.545
Lystrosaurus_murrayi	0.288 6.003 0.427 0.726 0.466 0.143 2.002 0.175 8.4 0.101 10.358 11.7 0.816 0.316 0.793 0.754 0.478 0.46 0.441 0.843 1.455 0.392 0.605
Shansiodon	0.265 6.064 0.327 0.163 0.538 0.633 1.314 0.13 7.2 0.1 9.78 11.2 1.129 0.286 0.821 0.84 0.575 0.479 ? 0.758 1.363 0.363 0.675
Tetragonias_njalilus	0.378 5.912 0.354 0.201 0.574 0.446 ? 0.125 6.8 0.088 10.009 10.4 1.004 0.205 0.858 0.796 0.447 0.481 0.3 0.675 1.852 0.286 0.596
Vinceria_andina	0.267 6.099 0.352 0.201 0.49 0.466 ? 0.137 7.0 0.153 10.552 11.3 0.983 ? ? ? ? ? ? ? ? ? ?
Rhinodicynodon_gracile	0.304 6.213 0.253 0.5 0.523 0.435 1.568 0.1 ? ? 9.174 10.1 0.879 0.24 0.875 0.734 ? ? ? ? ? ? ?
Dinodontosaurus	0.398 6.104 0.347 0.24 0.461 0.328 1.414 0.135 7.3 0.074 10.155 10.9 0.926 0.202 0.814 0.653 0.398 0.507 0.423 0.652 1.896 0.31 0.752
Angonisaurus_cruickshanki	0.339 6.301 0.514 0.667 0.572 0.6 1.491 0.19 5.9 0.06 10.206 10.0 1.012 0.143 0.785 0.722 ? 0.524 ? 0.647 2.541 ? ?
Kannemeyeria_simocephalus	0.421 6.121 0.409 0.289 0.531 0.479 1.461 0.147 9.8 0.074 10.478 12.1 1.147 0.179 0.8 0.686 0.551 0.558 0.338 ? 1.381 0.372 0.411
Kannemeyeria_lophorhinus	0.361 6.286 ? 0.663 ? 0.318 2.051 0.149 10.8 0.086 10.432 ? ? 0.077 0.786 0.542 ? ? ? ? ? ? ?
Dolichuranus_primaevus	0.356 6.079 0.392 0.293 0.484 0.4 1.339 0.143 8.7 0.085 10.672 9.7 1.018 0.192 0.756 0.542 ? 0.519 ? ? ? 0.425 ?
Sinokannemeyeria	0.42 6.14 0.478 0.543 0.382 0.175 1.505 0.161 5.9 0.109 10.469 ? 0.918 0.243 0.549 0.385 0.494 0.489 0.556 0.458 1.187 0.408 0.405
Parakannemeyeria	0.455 6.28 0.377 0.359 0.354 0.195 1.468 0.122 7.5 0.102 9.688 12.3 0.92 0.166 0.79 0.515 0.467 0.52 0.478 0.443 1.465 0.411 0.294
Xiyukannemeyeria_brevirostris	0.286 6.203 0.413 0.46 0.433 0.23 ? 0.169 8.5 0.086 10.027 8.9 0.795 0.32 ? 0.668 ? ? ? ? ? ? ?
Rabidosaurus_cristatus	0.464 ? ? 0.268 0.607 ? ? ? ? ? ? ? ? ? ? ? ? ? ? ? ? ? ?
Rhadiodromus	0.509 6.144 0.403 0.285 0.574 0.254 ? 0.122 6.9 0.088 10.023 10.8 1.085 ? ? ? ? ? 0.604 ? ? ? ?
Wadiasaurus_indicus	0.423 6.105 0.337 0.539 0.506 0.523 ? 0.218 ? ? ? 10.6 1.052 0.344 0.9 0.81 0.607 0.563 0.45 0.562 1.239 0.417 0.355
Shaanbeikannemeyeria	0.527 6.069 0.513 0.886 0.5 0.414 ? 0.157 7.8 0.176 10.642 11.3 1.432 ? 0.734 ? ? 0.58 ? ? ? 0.416 ?
Rechnisaurus_cristarhynchus	0.51 5.971 0.436 0.154 ? 0.211 ? 0.14 9.9 ? ? ? ? ? ? ? ? ? ? ? ? ? ?
Uralokannemeyeria_vjuschkovi	0.49 ? 0.407 0.526 0.454 0.233 ? 0.147 ? 0.091 ? 11.9 1.154 ? ? ? ? ? ? 0.819 1.193 ? ?
Zambiasaurus_submersus	? ? ? ? ? ? ? ? ? ? ? ? ? ? ? ? ? 0.498 ? ? ? 0.401 ?
Placerias_hesternus	? ? ? ? ? ? ? ? ? ? ? ? ? ? ? ? ? 0.49 0.499 ? ? ? ?
Moghreberia_nmachouensis	? ? ? ? ? ? ? ? ? ? ? ? ? ? ? ? ? ? ? ? ? ? ?
Stahleckeria_potens	0.438 5.992 0.445 0.726 0.491 0.288 ? ? ? ? 10.284 8.7 0.953 0.237 0.856 0.897 0.442 0.53 ? 0.391 2.217 0.447 0.565
Sangusaurus	0.411 6.177 0.461 0.618 ? 0.368 1.129 0.144 ? 0.091 ? 9.2 1.061 ? 0.832 ? ? ? ? 0.592 1.944 0.433 ?
Eubrachiosaurus_browni	? ? ? ? ? ? ? ? ? ? ? ? ? ? ? ? ? 0.538 ? ? 1.789 ? ?
Jachaleria	0.392 6.078 0.393 0.199 0.379 0.499 1.431 0.161 4.0 0.084 10.269 ? 0.766 ? 0.822 0.766 0.427 ? 0.529 ? 0.808 0.434 0.667
Ischigualastia_jenseni	0.483 6.139 0.423 0.331 0.479 0.528 1.39 0.151 5.7 0.064 10.023 ? 1.032 ? 0.912 0.841 0.419 0.577 0.561 ? 0.818 0.412 0.526
TSK_2	0.385 6.098 ? 0.321 ? 0.285 1.766 0.135 ? 0.124 9.866 ? 0.997 ? ? ? ? ? ? ? ? ? ?
Abajudon	0.322 ? 0.260 0.918 0.438 0.125 2.844 0.151 9.4 0.073 ? 8.0 0.951 0.302 0.898 1.016 ? ? ? ? ? ? ?
&[numeric]
Biarmosuchus_tener	000002000000000000010000000????00000000000000?200020000000000000100000100100000000000000?01201??0??00?0??0000??0000000000000000??0000000000000?0000?100001101?000110000110?
Hipposaurus_boonstrai	000002000000000000010000000????000000000000010200000000000000000100000101100000000000000?01001??0?000?0???000000?00000000000000??0000010000000?10000100011101????0?000010??
Archaeosyodon_praeventor	000002000000000000010000100????00000001000000?2000100000000000001000??010000001000000000?01201??0???0????????????00001100000000??000????????0??????????????????????????????
Titanophoneus_potens	000002000000000010000000000????00000001001000?10000000[0 2]000000000100000010000001000000000?012010000000?0010000100000000000000000??0001000000000?00000?0000000011001100012?1?
Gorgonops_torvus	000002000000000000000000000????000000001000010200020002000000000100000100000000000000000?012010000000?0000000000000000000000000??0000011000000?000001000100010001101110011?
Lycosuchus_vanderrieti	000002000000000000000001000????00020000000000?102011001000000000100000010010001100000000?0120100100001001?000000000000000000000??0100020100000?00000100010001110???000?????
Glanosuchus_macrops	000002000000000000010000000????00000000000010?102011001000000000100000010010001100000000?01201000000010010000000000000000000000??0100020100000?000001000100011100100001211?
Biseridens_qilianicus	000002100000000010010000100????00000001000100?2000100000000000001001??000000001000000000?00?01??????0?0???000100?00101001000000??000000?1???0??????????????????????????????
Anomocephalus_africanus	???????0?????00??0?0?100??0??????0???0???00??????????????0??0000?0?01???????????????1???????2????????????????????1??010???????0????????????????????????????????????????????
Tiarajudens_eccentricus	0??????0?0??000010000000100????000??00?0000??????????????00?0000?0?01?????????????011????0??2???????????????????????????????????????????????????00???0001010??????????12?1?
Otsheria_netzvetajevi	000002101000000?1001?100?00?????0000000000000?2?0010?000000000101010??11??10100001010000?00011???00?000???1?1??0???????????????????????????????????????????????????????????
Ulemica	000002101010000?1001?000100????00000001000000?200010?0000100001010?000110011102001010010?00011??1000010?10??1?0001010111101000100[0 1]00000010011??????????????????????????????
Suminia_getmanovi	000002?0101000001001?100200?????0010000000000?210010?00002000010?010001100?1102021010010?010110?100?0000101001?0?10002111000001000000000000210?000000000000010000000000010?
Patranomodon_nyaphulii	000?0?10101?00002000?100100?????000000000000100100000010000000100000000000100010?0110000?01011??0001100?10100100?10?01001000000????00031000010??????????????0110???000?????
Galeops_whaitsi	00000210101000002000?100100??????1?000000000???1000?00?0?200001010?00100001?0010?0?10000?0?0110?1?1?1????????????1000??0100000100?10113100011??0010000000100??????????????0
Galepus_jouberti	?00?02??1????00??0????????0??????????????00??????????????????0?????0??????????????????????????????????????????????0?01001?0000??????????????1??????1?00010?0?11?00?000?2?1?
Galechirus_scholtzi	00??0??010?0?00??000?1001?0??????1??00???????????????????????????0?0?????????????????????????????????????????????10?0100100??0???????031????1???0000??0?1000011?00?0001211?
Eodicynodon_oelofseni	???????01?100000200001001?0????????0?000000010??0010001002010?200??0??0000111030????012???1310??000???0????0?10?010111002000001001?01??1??121??????????????????????????????
Eodicynodon_oosthuizeni	0000101210100000200002001010000001100000000010010010001002110020101010000011103010010121001310010000100001101100010101002001002001001131111210?0001000000110?1101000001???1
Colobodectes_cluveri	01001012101000002000020010100000011000001000101100000010?21100201010??0001111030100101210013100100001100??10???0???????????????????????????????????????????????????????????
Lanthanostegus_mohoii	??????????1????0?????200?1?????0???0?0100010101?001000200???0000?0?0??0???1110301?01012110?310?100?0110????????????????????????????????????????????????????????????????????
Eosimops_newtoni	111010121110000020000210111200010100001000101011001000200211002011101010[0 1][0 1]111030100101210013100?000011001?1?1100?1011???4000111000001131?11210?10011?0000010?1101000001????
Diictodon_feliceps	11101012111000002000022??1120001[0 1]1[0 1]0001000001011200000[1 2]00211002011101011111110301001012100121000000112001110110001012???2001111001001131111211?1001100000000?11010000012110
Robertia_broomiana	11101012111000002000021011120001010000100000101100100020021100201110101000111030100101210012100?000111001?1011000101110?200111100?001131111210?1001?00000000?11???00001211?
Prosictodon_dubei	11101012111000002000021011120001011000100000101120000010?2110020111010100011103010010121001210??00011100111?1100?1011???20?111100?0?1??1??121??????????????????????????????
Endothiodon_bathystoma	1001[0 1]2111012000020100111200?????0[1 2]?00100[0 1]10111111010102002110020101110100011113021010120?0131000000112001?1?1100010112003011202001001141111212?00010?0000100?11011?00012110
Endothiodon_tolani	100102111012000120100211200????00[0 1]0000001??010111010101002?1??2??0?11011001111302101012100131000000?1200??11110001011200301120200100114111121??????????????????????????????
Niassodon_mfumukasi	1???22?11?1?0001???0?11011100101010000000000212100200010020100201010101000111131110?012110121000000111001111110001011??0400?20200100114?111211?????????????????01???1??????
Brachyprosopus_broomi	101112121011000120000211111001000100001000001011001000200211002010101000001110302001012100121101000112001?11110001011200200120100100113111121??0001??000010????????01??????
Pristerodon_mackayi	110012121010000020000210111001000100001000?010110010001012110020111010100011103021010121001210010001120011101100010112002?01202001001131111212?1101000000100?1101?00001211?
Emydops	101110121010000020000200111101010100000000001011001000100201002011101011111110301101012110021000001112001011110101011[1 2]004000202101001131111210?1?010?00000001110???0001211?
Compsodon_helmoedi	1011201210100001201002001111010101000010000021111000003012110020110010111011103111010121100210000111120011110101???????????????????????????????????????????????????????????
Digalodon_rubidgei	12102012101000012000022??0110100010000001000101100200030121100201110101111111030110101210012100000111?001?111100?1012???40002????100???????????????????????????????????????
Dicynodontoides	10112012101000012000022??11101000100000010002011200000100211002010101010001110301101012110021000001112001011110002012???41000021010011311112110010110110001?1??011001112110
Kombuisia_frerensis	10102012101000012?00012??011010101000000100020102011?1??02?10020?0101?1???11103011010?21100?1??10011120010110100?2012???4101002001?011?110121??????????????????????????????
Myosaurus_gracilis	10002112101000012000012??11101010120000010001020002000100201002010101011111010311101012110121001001112001111110001012???410000210??01131??1210?11011010110?????0???????????
Cistecephalus_microrhinus	10102012101000012010012??111010101000[0 1]101[0 1]000?21002000101201002001101011011110311101012110021?00?011120001?11100?1112???4000202101011131111210?1100012210011111010011012110
Cistecephaloides_boonstrai	10002012101000012010012??01101000100000110000?210020001012010020001010110111103?11010120??0?1????011110?1??11100?1112???4000202101?111?111121??????????????????????????????
Kawingasaurus_fossilis	10002012101000012010012??01101000020000010000?21002001???201002001?010110111103111010120?0011????011110?0??0110001012?????00001001111???11121??11000?2200011?11???????1211?
Daqingshanodon_limbus	12002212101000002000022??11010100200?00010001011100000000211?02011101011??12203011010121001210?00??11?????1011?0?1112???2101301211?0114111121??????????????????????????????
Keyseria_benjamini	120022?21010000?2000022??110101102000000000010110000?0000211002011101011??122030?1?10121000210??01?11210111?1100???????????????????????????2???????????????????????????????
Rhachiocephalus_magnus	12002212101100002000012??11000100200110001001011200000210211002011101111111220301101012100121000012112001110110001112???200130100100114111121??0011[0 1]11010100???????011????1
Kitchinganomodon_crassus	12002212101100002000012??11000100200110001001011200000211211102011101111011220301101012100131?0?012112011?101100?1112???2001?0121??0?1411?121???00???10?010????????????????
Oudenodon_bainii	12002212101100002000012??11010100210[0 1]01000001011100000101211102011101011111220301101012100121000012112001110110001112???200130121100114111121200001001010100?11011101112110
Tropidostoma_dubium	12002212101100002000021011101010021010100000101110000010121110201110101100122030110101210012100?012112001110110001111???2001301211?01141111212?0001001010100???0???011????0
Australobarbarus	120022121011000020000210?110101002?0?010000010111000001012111020111010111112203010010121011210??0121120111101100?111120?2001301211?01141??121??????????????????????????????
Syops_vanhoepeni	1??012?21011000?2000022??1101011020011?00??02011201010100??1?????11??011111220301111?121?1??1?????2????0??1?010??1?1????200????????0???11?12???????????????????????????????
Odontocyclops_whaitsi	12002212101100002000022??1101010020012000000211110000020121110201110101111122030110101210012100?012112011?101100?1112???200130121??011411?121200001??1010100???0111011?????
Idelesaurus_tataricus	12002212101100002000022??1101010021011000000211110000010021110201110101100122030111101210012100000211201??100100?1112???2101301211?0114111121??????????????????????????????
Aulacephalodon_bainii	12002212101110002000022??11010[0 1]002011200[0 1]100[1 2]001001000[1 2]00211102011101011011220301111012100121000012112[0 1]01110110001112???200130121110114111121210001001010100?11010101112111
Pelanomodon_moschops	12002212101110002000012??1101010020112001100210100100020021120201110101111122030111101210[0 1]12100?0121121011101100???????????????????????????2???????????????????????????????
Geikia_locusticeps	12002212101110002000012??110101002011210110021111000002?02012020111010111112203011110121011210000221121011101100?1112???210130101100114111121??00?10???????????????????????
Geikia_elginensis	120022?2101110002000012??1101011120??21??100????10000???021120201??01?11111?2030?1??01210??210?10??????????????0?1012???210130121?????41??121?????????0101?????????????????
Elph_borealis	1??02??2101000002010022??110100100000010000010112000001002110020111010????12203011010?2100?11?000121120???101100?1112???20?130121110???????21??????????????????????????????
Interpresosaurus_blomi	1200??12101000002010022??1101001?0?000100???10??2?1???????????????????1???1???30??0????????????????????????????????????????????????????????????????????????????????????????
Katumbia_parringtoni	12002212101?0000??10022??11000010100001000001111200000100211?02011?010111112203011010121010210??0121121111?00100?1112???210130121110???????21??????????????????????????????
Delectosaurus_arefjevi	12002212101000002100022??1101000011000100000201120101010021100201110101111121030111[1 2]01210112110?0121121???1001000??????????????????????????????????????????????????????????
Dicynodon_lacerticeps	12002212101000002000022??110100001[0 1]0011000002011201010100211002011101011111210301111012100121000022112111110110011112???210130221111115111121??????????????????????????????
Dicynodon_huenei	120022?2101000002000022??110100001000110[0 1]0002011201010100211002011101011111210301111012101121000022112111110110011112???2?013022111?1151111212?0001011010100?110111011?????
Daptocephalus_leoniceps	120022?2101000002000022??11010010110011000002011201010100211002011101011111210301111012101011101012112111110111011112???210130221111115111121????????101110????0111????????
Dinanomodon_gilli	12002212101000002110122??110100011100110000020112010101002110020111010111112103011110121110211??01211211111011?011?1?????10?3?121??1?1511?12???????????????????????????????
Peramodon_amalitzkii	1??0?????0?00000201002???11?100101100010000020112010?0100211002011?010???????????????12????21?0?0?2?121?11?0?1???111????210???221111?1511?12?3?100101??????????????????????
Vivaxosaurus_trautscholdi	120022?2101000002010022??1101000111000000000201110101010021100201110101100121030111[1 2]01210112110?022112[0 1]?1?10110011112???210130221??1115110121??000??1101110????????????????
Jimusaria_sinkiangensis	1200???210110000200002???110200001000010000010112010101012110020111010????1210301?11012100?21101022112111?10???0?1112???21013022110111511?121??????????????????????????????
Sintocephalus_alticeps	120022?21010000?2000022??110000000101100000010111010?010121?0020?1?0??????12103011?1012101?210??0??????????????????????????????????????????2???????????????????????????????
Basilodon_woodwardi	120022?2101100002000022??11000000200111000002011101000101211002011101011111220301111012101?210??0121121?1?1?1101?1?1?????1????221??????1???2???????????????????????????????
Turfanodon_bogdaensis	12?0???2101?0000???0?22??1101001111001000??0201120101010121100201?10??????1210301??20121111211??0121121???1011001??????????????????????????????????????????????????????????
Gordonia_traquairi	120022?21?10000??000022??1101001?2?0?010?00010112010?010?211002011?010?1??1?103??????12101??1???0???12??11???1?0?1112???2?0?30221????1?1??121???001??10?0100???0???????????
Euptychognathus_bathyrhynchus	120022?2101101102000022??1101001?0?1?1000000101120101010?21100201110101111121030?1???1210?1210??02211?11??101100?1112???2101302211?1???1???21??????????????????????????????
Lystrosaurus_hedini	12002212101111102000022??11010000200110001001011001010100211002011101011111210301112?121010411??02211210??10110011112???210130221101115110121?????1????????????????????????
Lystrosaurus_maccaigi	120022?21011111?2000022??110100110101110?10020?10010?0100211002011101?11111210301012?121010411??02211210??1?1100?1112???210130221??11151??1213????????010100?11?11?00112111
Lystrosaurus_curvatus	120022?2101111102000022??11010010210111001002011001010100211002011101011111210301012?121011211000221121???1001001111?????10???221101?1511?12???0001??10101?0???1???001?????
Lystrosaurus_declivis	12002212101111102000022??11010010212111001002011001010100211002011101011111210301012?12101121100022112101110010011112???2101302211011151101213?0??1??1011100?11111101112111
Lystrosaurus_murrayi	12002212101111102000022??11010010202110001002011001010100211002011101011111210301012?121011211?0022112111110110001112???210130221101115110121??0001111011100?111??101112111
Shansiodon	12002212101100002000022??1101001?2?0011010002011201120101201002111101?????1210301?12?12101??1?0?0221120?111?110011112???20013022110??0?1??1212?0001??1110111?110???1111211?
Tetragonias_njalilus	12002212101100002000022??110[1 2]0010200010010001011201120101201002111101011111210301012?121010211010?2112111110110011112???210130121101105111121200001001110100?1101111121211?
Vinceria_andina	120022?21011000?2000022??11020010200?1001000101120112010120100201110??11111???30??12?121010211??022?1?0?111?11???1??2?????????????????????121??????????????????????????????
Rhinodicynodon_gracile	120022?2101100002000022??110100102100110100010112011201002010021111010????121030?112?12101??1?0?022?1?????1?0100?1112???210130221??11??1??121??000100101?100???0111112?????
Dinodontosaurus	120022?2101100002010022??110100103100100100020112011201012010021111010111112103000110121010111?1022?1211???0100011112???21013012110010?11?121300001001100101?1101110121211?
Angonisaurus_cruickshanki	120022?21?1100002?00112??1101001???001001100201100111010120100201110??11111???30?1???12101??110?0221120???1?110?11112???21013012110110011?1213??00100?10?10????0111????????
Kannemeyeria_simocephalus	120022?2101000002110022??01020000320010011012011211020101211002011101011111210301112?1210101111102212201??10100111112???210130221101115111121300011001010100?11011101112111
Kannemeyeria_lophorhinus	120022?2101000202110122??010100003200200100110112110201012110?2011101?11111210301?12?12101111101022??201??1?000??1112???210130121??110?010121???00???11?110????0???????????
Dolichuranus_primaevus	120022?2101100002110022??1102000030001001100101121102010120100201110101111121030101101210106110?02212200??1?1001?1112???2101301211?110?11?121??0000??1100101???????012?????
Sinokannemeyeria	120022?2101000202120022??11010000310?10011012011201010101201002111101111111210301??2?12101?211??0221?20?1110100111112???2101301211???0?11?1212000010?1110101?110???0111211?
Parakannemeyeria	120022?2101100202020122??110200003?0110011012011201010101201002111101011111210301?12?1210101110?022??2011110100111112???2101?0121???1??11?1213?0001001010100?110111[0 1]111211?
Xiyukannemeyeria_brevirostris	120????21011002?2020022??110200103?011001101201120101010?2010021111010111112??301?12?12??10211??022??20?111?000??1112???210???1211??1??11?121???0?1??1110?00?110???0111211?
Rabidosaurus_cristatus	120?22?2101000002110022??110?000?3?0010011?1201?0?1??010?211??2?1110??????12??30101??121?1?11???0?2????1??1??00?1?????????????????????????????????????1????????????????????
Rhadiodromus	120022?2101100002010022??11020000310[0 1]1001101111120102010?20100201110??1111121030?1?1012??1??1?11022?220???10110????????????????????????????????????????????????????????????
Wadiasaurus_indicus	120022?21010000?21100[1 2]2??110?000???0010??001??11011??0??120100201?1010????1???30??12?12101??1???022??20???1?10?1?1112???2??130?????????11?121200101?01111101???0111111?????
Shaanbeikannemeyeria	120022?2101100002010022??110100003100100110110112010?0101211002111101?1111121030111?012101?211??0221220?????100??1112???20?1??121????????1?21???001??1??1100???????011?????
Rechnisaurus_cristarhynchus	120022?21011002?2010122??110?000030001001001??1?10102010?2??0?2???????????121030?011012101??1???0221220???????0????????????????????????????????????????????????????????????
Uralokannemeyeria_vjuschkovi	120022?21?11002?2??0122???10?000????01?0110120111010?010?201?02011101011111???30?????12???1211??022?220???1?100????????????????????????????2?2?????????????????0???????????
Zambiasaurus_submersus	120022?21??1???????0012???1?0?????????00???10?1100???010220???2?1????0??????????????????????????????????????110????12???2??1??????0?????????1?0?111001?01100???0111111?????
Placerias_hesternus	120002?21??000202000022??11100000310?100110110100011101022010120111010???????????????1????051110022??20?111?101?11112???200130???10??1?1??121?00111001?0010????0111111????1
Moghreberia_nmachouensis	1?0002?21010002??020022???102000?3?0??0011?1201000111010220?01201??0?0111112103011????210???1??0?221?20?????101??1112???2?013012110????0??121??????????????????????????????
Stahleckeria_potens	120020?2101100002120112??11010000310010111010?11001010102201002011101011111210301111012111011111022112111?10100011112???210130121101110011121310101001110101?1101111111211?
Sangusaurus	120022?2101100000010112??01010000310020111001011101020102201002001101?1???1210301112?121010111110221121???11100011112????10130121111?100111213?????????????????0111111?????
Eubrachiosaurus_browni	????????????????????????????????????????????????????????????????????????????????????????????????????????????????????????????????????????????????101??1?0010????0???????????
Jachaleria	12002212101100002110112??110100103101101110020112011201022010020111011111112103010?2?121010111?102213200??101000??112???2?01?0????????????121210010???1????1???0111111?????
Ischigualastia_jenseni	120022?2101100002120112??1101000031001011101101120112010220100200110111111121030??12?121010511?10221320?11101000?1112???2101301????1??001?121210100101100101?1101111111211?
TSK_2	120022?21010111020000220?1100001100111000??010111010?01002?1????1?101?1111121030?11201210112100002211?01??1011001??????????????????????????????????????????????????????????
Abajudon	100102011?1000012000021111000??0010000001000101000100010021100201010101000111130200101210012101?00001100??11???0?1011200301020210100???????0???????????????????????????????
;
